# Supplementary material for: Computational investigation of two-dimensional borides with planar octacoordinated main group elements
Source: Royal Society of Chemistry journal article supplement (doi:10.1039/d1cp02505h), 2021-01-01
Supplement: d1cp02505h1.pdf [file d1cp02505h1.pdf]

## Supplementary Information

# Computational Seeking of Two-dimensional Borides with Planar Octacoordinated Main Group Elements

Jiashu Yang<sup>1,2</sup>, Linke Yu,<sup>1</sup> Fengyu Li<sup>1,\*</sup>

<sup>1</sup> School of Physical Science and Technology, Inner Mongolia University, Hohhot, 010021, China

<sup>2</sup> Key Laboratory of Materials Modification by Laser, Ion and Electron Beams (Dalian University of Technology), Ministry of Education, School of Physics, Dalian 116024, China

\* Corresponding Author: fengyuli@imu.edu.cn (FL)

**Table S1** The calculated geometry parameters of XB<sub>4</sub> monolayers including the lattice constants ( $a = b$ ), the distance of X–B ( $d_1$ ), the B–B bond lengths of B squares ( $d_2$ ) and the shared B–B edges between adjacent X@B<sub>8</sub> wheels ( $d_3$ ).

|           | LiB <sub>4</sub> | BeB <sub>4</sub> | BB <sub>4</sub>  | CB <sub>4</sub>  | NB <sub>4</sub>  | OB <sub>4</sub>  | FB <sub>4</sub>  | NeB <sub>4</sub> |
|-----------|------------------|------------------|------------------|------------------|------------------|------------------|------------------|------------------|
| $a$ (Å)   | 4.13             | 3.97             | 3.84             | 4.02             | 4.02             | 4.09             | 4.19             | 4.34             |
| $d_1$ (Å) | 2.25             | 2.14             | 2.07             | 2.17             | 2.17             | 2.21             | 2.26             | 2.37             |
| $d_2$ (Å) | 1.68             | 1.66             | 1.62             | 1.69             | 1.68             | 1.71             | 1.71             | 1.73             |
| $d_3$ (Å) | 1.76             | 1.62             | 1.54             | 1.63             | 1.65             | 1.67             | 1.72             | 1.90             |
|           | NaB <sub>4</sub> | MgB <sub>4</sub> | AlB <sub>4</sub> | SiB <sub>4</sub> | PB <sub>4</sub>  | SB <sub>4</sub>  | ClB <sub>4</sub> | KrB <sub>4</sub> |
| $a$ (Å)   | 4.35             | 4.18             | 4.04             | 4.05             | 4.11             | 4.13             | 4.31             | 4.70             |
| $d_1$ (Å) | 2.39             | 2.27             | 2.18             | 2.18             | 2.22             | 2.24             | 2.34             | 2.60             |
| $d_2$ (Å) | 1.69             | 1.71             | 1.70             | 1.71             | 1.72             | 1.71             | 1.77             | 1.76             |
| $d_3$ (Å) | 1.96             | 1.76             | 1.64             | 1.63             | 1.69             | 1.72             | 1.82             | 2.21             |
|           | KB <sub>4</sub>  | CaB <sub>4</sub> | GaB <sub>4</sub> | GeB <sub>4</sub> | AsB <sub>4</sub> | SeB <sub>4</sub> | BrB <sub>4</sub> | ArB <sub>4</sub> |
| $a$ (Å)   | 4.72             | 4.51             | 4.11             | 4.21             | 4.25             | 4.24             | 4.29             | 4.51             |
| $d_1$ (Å) | 2.63             | 2.48             | 2.22             | 2.27             | 2.30             | 2.30             | 2.34             | 2.45             |

|           |                        |                        |                        |                        |                        |                        |                        |                        |
|-----------|------------------------|------------------------|------------------------|------------------------|------------------------|------------------------|------------------------|------------------------|
| $d_2$ (Å) | 1.68                   | 1.72                   | 1.72                   | 1.76                   | 1.75                   | 1.73                   | 1.73                   | 1.82                   |
| $d_3$ (Å) | 2.34                   | 2.07                   | 1.68                   | 1.71                   | 1.78                   | 1.80                   | 1.85                   | 1.94                   |
|           | <b>RbB<sub>4</sub></b> | <b>SrB<sub>4</sub></b> | <b>InB<sub>4</sub></b> | <b>SnB<sub>4</sub></b> | <b>SbB<sub>4</sub></b> | <b>TeB<sub>4</sub></b> | <b>IB<sub>4</sub></b>  | <b>XeB<sub>4</sub></b> |
| $a$ (Å)   | 5.46                   | 4.75                   | 4.31                   | 4.30                   | 4.42                   | 4.37                   | 4.13                   | <b>NeB<sub>4</sub></b> |
| $d_1$ (Å) | 3.17                   | 2.65                   | 2.34                   | 2.33                   | 2.41                   | 2.39                   | 2.24                   | 4.24                   |
| $d_2$ (Å) | 1.59                   | 1.69                   | 1.76                   | 1.77                   | 1.77                   | 1.75                   | 1.71                   | 2.30                   |
| $d_3$ (Å) | 3.21                   | 2.35                   | 1.83                   | 1.79                   | 1.91                   | 1.90                   | 1.72                   | 1.73                   |
|           | <b>CsB<sub>4</sub></b> | <b>BaB<sub>4</sub></b> | <b>TlB<sub>4</sub></b> | <b>PbB<sub>4</sub></b> | <b>BiB<sub>4</sub></b> | <b>PoB<sub>4</sub></b> | <b>AtB<sub>4</sub></b> | <b>RnB<sub>4</sub></b> |
| $a$ (Å)   | 4.80                   | 5.18                   | 4.44                   | 4.51                   | 4.54                   | 4.51                   | 4.48                   | 6.40                   |
| $d_1$ (Å) | 2.71                   | 2.96                   | 2.42                   | 2.46                   | 2.49                   | 2.48                   | 2.45                   | 3.84                   |
| $d_2$ (Å) | 1.63                   | 1.63                   | 1.78                   | 1.80                   | 1.76                   | 1.73                   | 1.75                   | 1.53                   |
| $d_3$ (Å) | 2.50                   | 2.87                   | 1.92                   | 1.96                   | 2.04                   | 2.06                   | 2.01                   | 4.25                   |

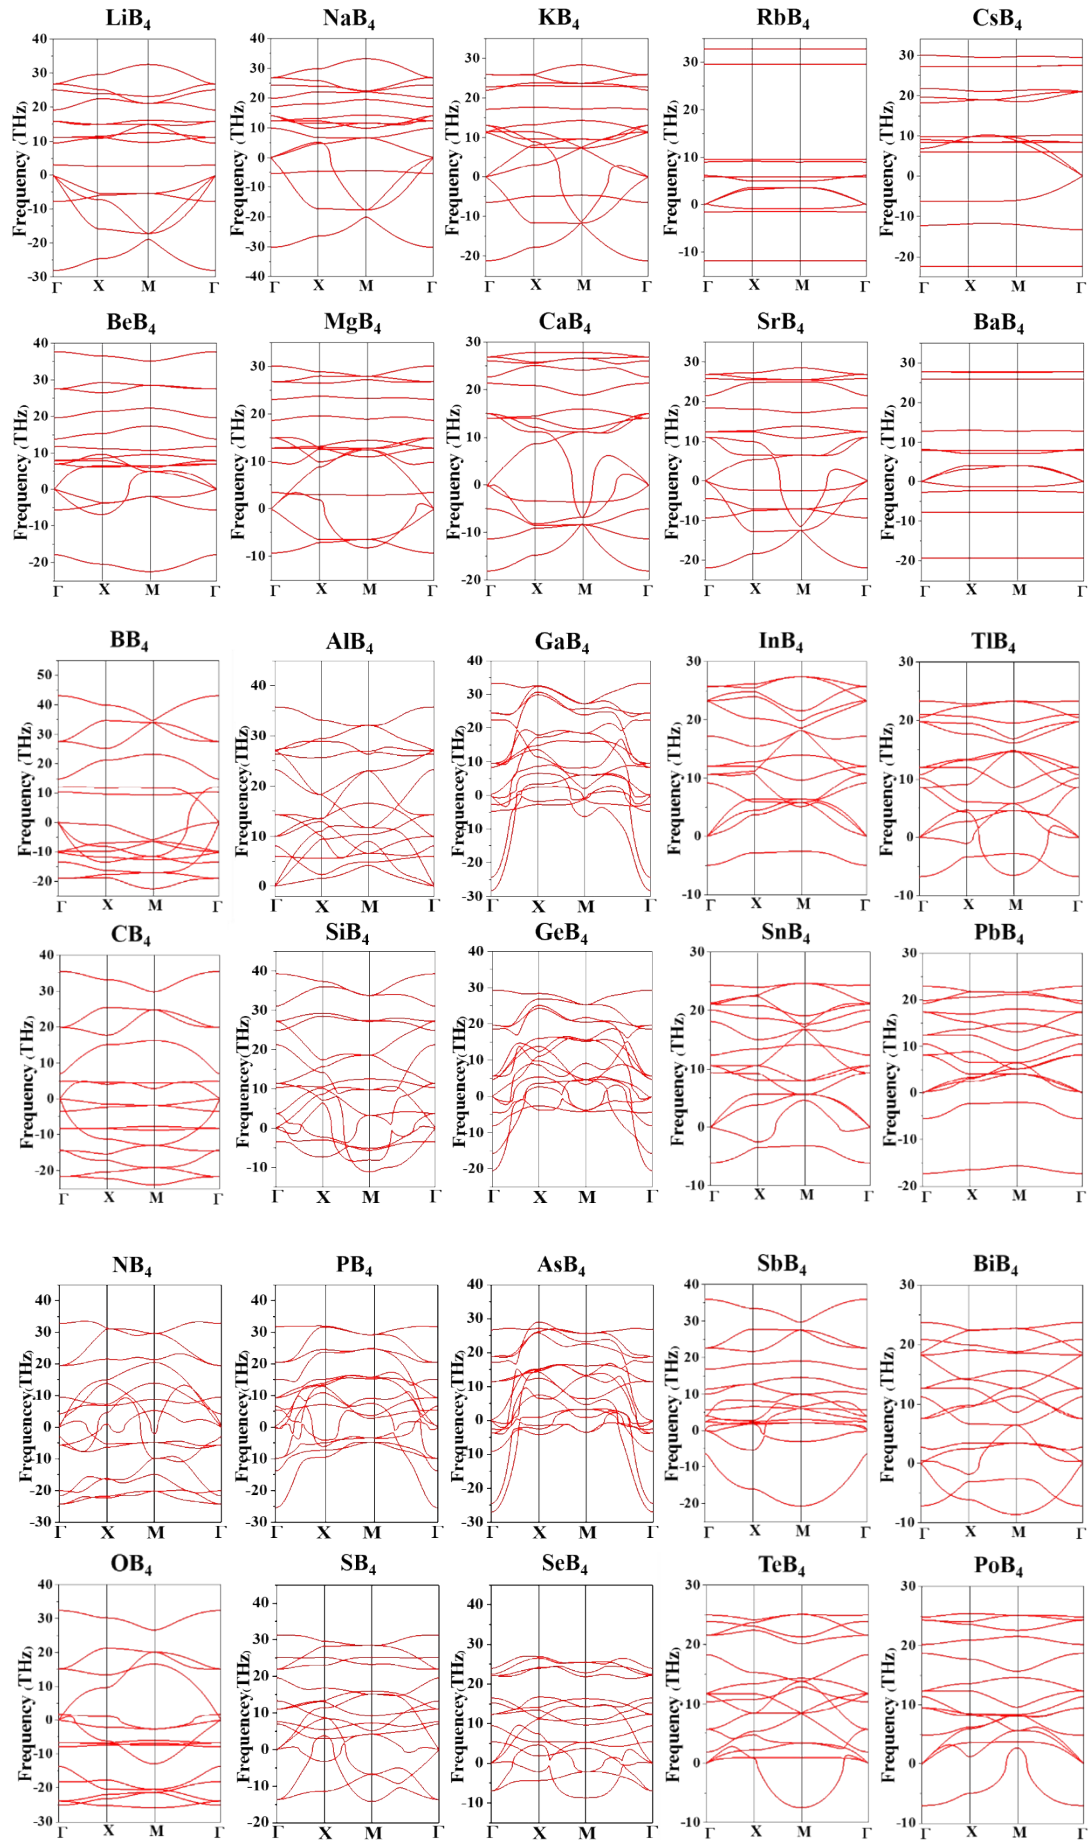

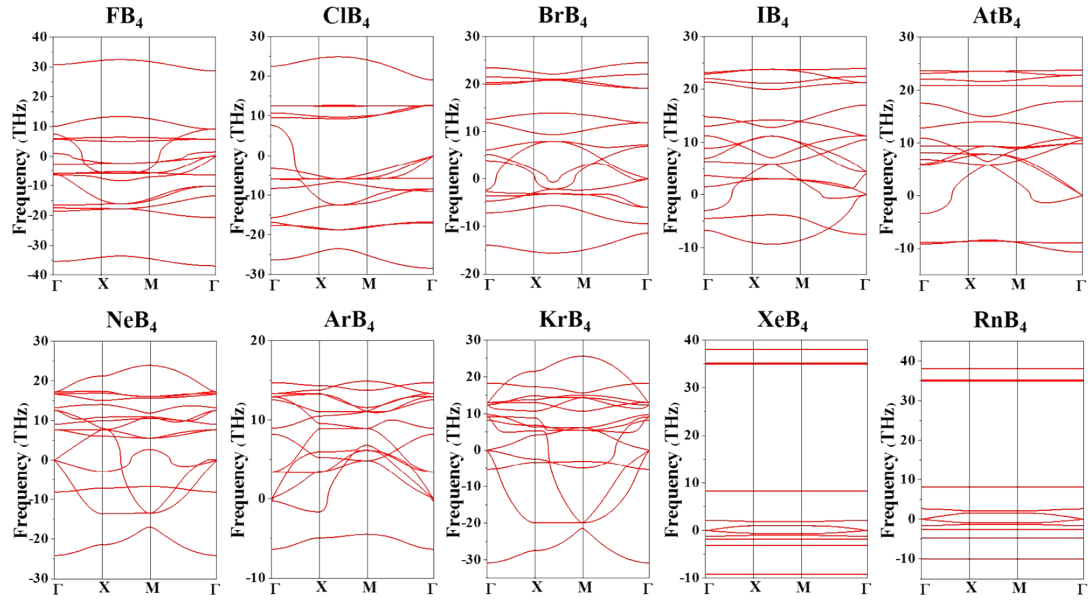

**Fig. S1** Phonon dispersion of the 40 planar  $\text{XB}_4$  monolayer ( $X = \text{As, Ga, Ge, N, P, S, Se, Si}$ ).  $\Gamma$  (0, 0, 0), X (0.0 0.5 0.0), and M (0.5 0.5 0.0) refer to special  $k$ -points in the first Brillouin zone in the reciprocal space.

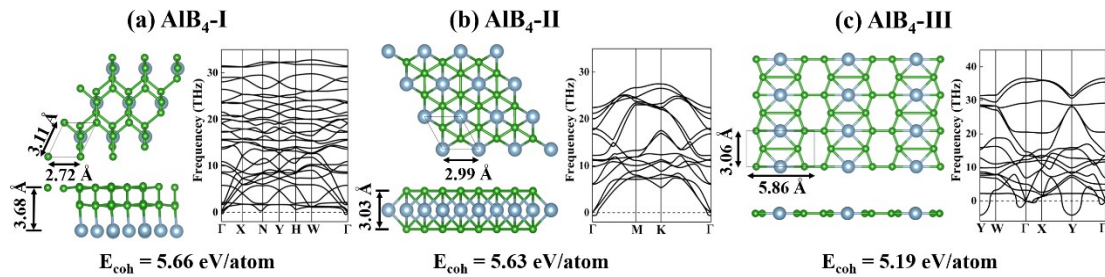

**Fig. S2** Two views and phonon dispersions of the  $\text{AIB}_4$  sheets obtained by PSO search:  $\text{AIB}_4\text{-I}$  (a),  $\text{AIB}_4\text{-II}$  (b) and  $\text{AIB}_4\text{-III}$  (c). Al and B atoms are denoted by blue and green spheres, respectively. The unit cell is marked by a black parallelogram. The tinny U-shape of negative frequencies near  $\Gamma$  point in the phonons of  $\text{AIB}_4\text{-I}$  and  $\text{AIB}_4\text{-II}$  does not indicate the dynamical instability of the two sheets, it is a common phenomenon in the calculated phonon spectra of 2D structures [V. Zolyomi, N. D. Drummond and V. I. Fal'ko, *Phys. Rev. B*, 2014, **89**, 205416; H. Yin, G. Zheng, Y. Wang and B. Yao, *Phys. Chem. Chem. Phys.*, 2018, **20**, 19177.].

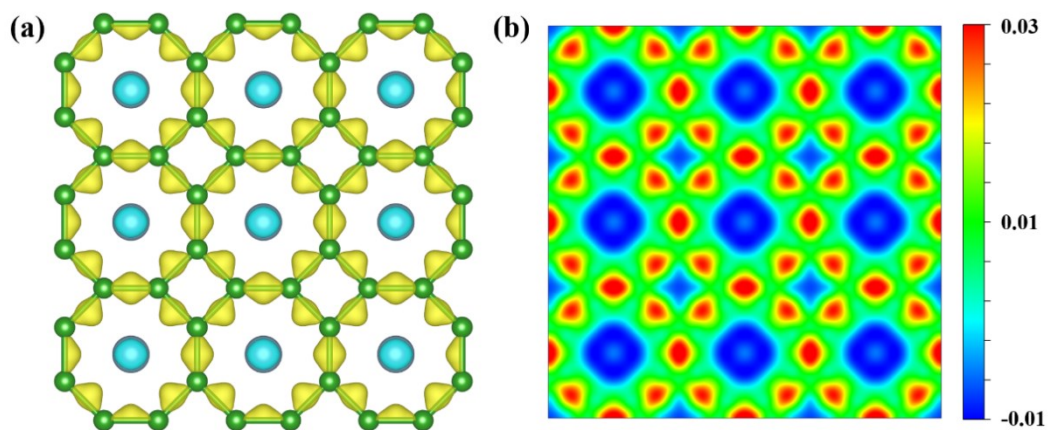

**Fig. S3** The 3D (a) and 2D (b) differential charge density map of the AlB<sub>4</sub> monolayer.
